# Supplementary material for: Microglial activation and tau burden predict cognitive decline in Alzheimer’s disease
Source: PubMed Central journal article supplement (PMC7241955; doi:10.1093/brain/awaa088), 2020-05-07
Supplement: awaa088_supplementary_data.pdf [file awaa088_supplementary_data.pdf]

## Supplementary Material

**Supplementary Figure 1.** Schematic representation of statistical analyses for one-step and two-step prediction procedures. Abbreviation: ACE-R: Addenbroke's Cognitive Examination – Revised; i: intercept; s: slope; PC: principal component; AV: [<sup>18</sup>F]AV-1451; PK: [<sup>11</sup>C]PK11195; Bas: baseline; y: years.

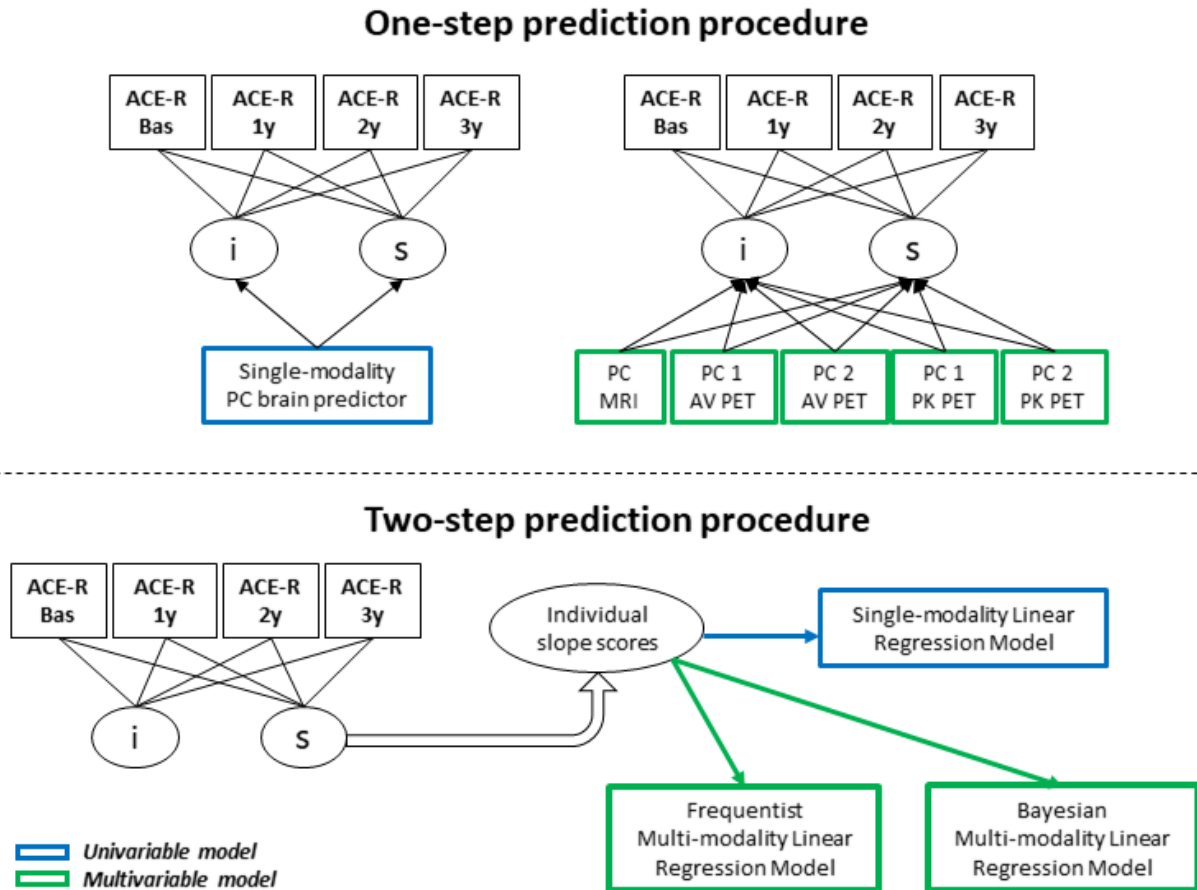

**Supplementary Table 1.** Counts and group comparisons between controls and patients who underwent ligand-specific PET scans on a GE Advance PET scanner (GE Healthcare, Waukesha, USA) and a GE Discovery 690 PET/CT. Chi-square tests resulted not significant for both tracers, indicating that subgroups of controls on different scanners for each ligand-specific PET were balanced with those of patients. In addition, to minimise differences in the data, the acquisition protocols (injected activity, scan duration) and image reconstruction strategies (frame durations, reconstruction algorithm) were matched between scanners. The transaxial reconstructed field of view (30 cm) and voxel dimension (2.34 mm) were invariant across scanners, as was the data analysis methodology. The use of scanners from the same manufacturer was also beneficial regarding the data corrections applied during image reconstruction.

| <i>[18F]AV1451 PET</i>  |          |                          |           |       |
|-------------------------|----------|--------------------------|-----------|-------|
|                         |          | scanner PET              |           | Total |
|                         |          | ADVANCE                  | DISCOVERY |       |
| Group                   | AD/MCI   | 18                       | 8         | 26    |
|                         | Controls | 8                        | 6         | 14    |
| Total                   |          | 26                       | 14        | 40    |
| Group comparison        |          | $\chi^2(1)=0.58; p=0.45$ |           |       |
| <i>[11C]PK11195 PET</i> |          |                          |           |       |
|                         |          | scanner PET              |           | Total |
|                         |          | ADVANCE                  | DISCOVERY |       |
| Group                   | AD/MCI   | 18                       | 8         | 26    |
|                         | Controls | 13                       | 2         | 15    |
| Total                   |          | 31                       | 10        | 41    |
| Group comparison        |          | $\chi^2(1)=1.57; p=0.21$ |           |       |

**Supplementary Table 2.** The fifteen Alzheimer’s disease related cortical regions of interest, considered for our principal component analyses. The name of each region is reported in the first column; while the second column gives the corresponding region numbers in the Hammers atlas.

| <b>Region</b>                      | <b>Numbers (R/L)</b> |
|------------------------------------|----------------------|
| Hippocampus                        | 1/2                  |
| Amygdala                           | 3/4                  |
| Anterior medial temporal lobe      | 5/6                  |
| Anterior lateral temporal lobe     | 7/8                  |
| Parahippocampal gyri               | 9/10                 |
| Superior posterior temporal gyrus  | 11/12                |
| Middle and inferior temporal gyrus | 13/14                |
| Fusiform gyrus                     | 15/16                |
| Insula                             | 21/20                |
| Posterior cingulate gyrus          | 27/26                |
| Posterior temporal lobe            | 31/30                |
| Inferiolateral parietal lobe       | 33/32                |
| Superior parietal gyrus            | 63/62                |
| Cuneus                             | 67/66                |
| Superior anterior temporal gyrus   | 83/82                |

**Supplementary Table 3.** Demographic and clinical characteristics for the subsample of control and patients groups.

|                                                                    | <b>Controls<br/>AV PET</b> | <b>Control<br/>PK PET</b> | <b>Group<br/>difference</b>   | <b>MCI+</b>    | <b>AD</b>       | <b>Group<br/>difference</b>   |
|--------------------------------------------------------------------|----------------------------|---------------------------|-------------------------------|----------------|-----------------|-------------------------------|
| <b>N</b>                                                           | <b>14</b>                  | <b>15</b>                 |                               | <b>14</b>      | <b>12</b>       |                               |
| <b>Disease Duration<br/>(years - mean <math>\pm</math><br/>SD)</b> | -                          | -                         | -                             | 3.8 $\pm$ 2.3  | 3.4 $\pm$ 1.8   | t(24)=0.60;<br>p=0.558        |
| <b>Sex<br/>(Female/Male)</b>                                       | 7/7                        | 8/7                       | $\chi^2(1)=0.03$ ;<br>p=0.858 | 7/7            | 5/7             | $\chi^2(1)=0.18$ ;<br>p=0.671 |
| <b>Age<br/>(years - mean <math>\pm</math><br/>SD)</b>              | 66.9 $\pm$ 7.6             | 69.6 $\pm$ 6.8            | t(27)=-1.04;<br>p=0.308       | 74.6 $\pm$ 6.4 | 69.1 $\pm$ 10.4 | t(24)=1.64;<br>p=0.115        |
| <b>Education<br/>(years - mean <math>\pm</math><br/>SD)</b>        | 15.8 $\pm$ 1.9             | 14.1 $\pm$ 3.0            | t(27)=1.77;<br>p=0.09         | 12.3 $\pm$ 2.8 | 14.0 $\pm$ 3.5  | t(24)=-1.39;<br>p=0.176       |
| <b>ACE-R Baseline<br/>(mean <math>\pm</math> SD)</b>               | 95.4 $\pm$ 3.1             | 95.5 $\pm$ 4.5            | t(27)=1.26;<br>p=0.220        | 80.6 $\pm$ 6.5 | 74.5 $\pm$ 10.8 | t(17.4)=1.70;<br>p=0.107      |

Abbreviations AV: [ $^{18}$ F]AV-1451; PK: [ $^{11}$ C]PK11195; ACE-R: Addenbroke's Cognitive Examination – Revised; SD: standard deviation; t(): t-test; p: p-value

**Supplementary Table 4.** Regional weights of the structural MRI component (left), and rotated regional weights of [<sup>18</sup>F]AV-1451 components (middle) and the [<sup>11</sup>C]PK11195 components (right). Abbreviations: GM=Grey Matter; Comp=Component.

| GM volumes                         |        | <sup>18</sup> F]AV-1451            |        |        | <sup>11</sup> C]PK11195            |        |        |
|------------------------------------|--------|------------------------------------|--------|--------|------------------------------------|--------|--------|
| Region                             | Comp 1 | Region                             | Comp 1 | Comp 2 | Region                             | Comp 1 | Comp 2 |
| Posterior temporal lobe            | 0.910  | Posterior cingulate gyrus          | 0.923  | 0.338  | Anterior lateral temporal lobe     | 0.920  | 0.201  |
| Middle and inferior temporal gyrus | 0.909  | Superior parietal gyrus            | 0.915  | 0.363  | Parahippocampal gyri               | 0.906  | -0.055 |
| Parahippocampal gyri               | 0.903  | Cuneus                             | 0.872  | 0.380  | Anterior medial temporal lobe      | 0.880  | 0.078  |
| Amygdala                           | 0.901  | Inferiolateral parietal lobe       | 0.872  | 0.451  | Hippocampus                        | 0.835  | 0.057  |
| Anterior medial temporal lobe      | 0.891  | Posterior_temporal_lobe            | 0.791  | 0.587  | Fusiform gyrus                     | 0.796  | 0.187  |
| Fusiform gyrus                     | 0.884  | Parahippocampal gyri               | 0.725  | 0.483  | Superior anterior temporal gyrus   | 0.743  | 0.389  |
| Superior posterior temporal gyrus  | 0.879  | Fusiform gyrus                     | 0.660  | 0.643  | Amygdala                           | 0.723  | 0.281  |
| Anterior lateral temporal lobe     | 0.875  | Hippocampus                        | 0.274  | 0.891  | Middle and inferior temporal gyrus | 0.680  | 0.626  |
| Hippocampus                        | 0.869  | Anterior medial temporal lobe      | 0.387  | 0.876  | Superior parietal gyrus            | 0.282  | 0.879  |
| Posterior cingulate gyrus          | 0.863  | Superior anterior temporal gyrus   | 0.395  | 0.858  | Posterior cingulate gyrus          | -0.340 | 0.847  |
| Inferiolateral parietal lobe       | 0.840  | Insula                             | 0.460  | 0.845  | Inferiolateral parietal lobe       | 0.434  | 0.831  |
| Superior parietal gyrus            | 0.821  | Amygdala                           | 0.508  | 0.791  | Superior posterior temporal gyrus  | 0.438  | 0.804  |
| Superior anterior temporal gyrus   | 0.812  | Anterior lateral temporal lobe     | 0.530  | 0.768  | Posterior temporal lobe            | 0.513  | 0.794  |
| Insula                             | 0.782  | Middle and inferior temporal gyrus | 0.687  | 0.694  | Insula                             | 0.385  | 0.755  |
| Cuneus                             | 0.735  | Superior posterior temporal gyrus  | 0.662  | 0.688  | Cuneus                             | -0.147 | 0.563  |

**Supplementary Table 5.** Results for the univariable regression models on slope (left) and intercept (right) across all population with age, sex and education as covariates.

| Model          |             | Dependent variable:<br>cognitive slope |           |          |         |              | Dependent variable:<br>cognitive intercept |           |          |         |              |
|----------------|-------------|----------------------------------------|-----------|----------|---------|--------------|--------------------------------------------|-----------|----------|---------|--------------|
|                |             | Est                                    | Std Error | Std Beta | t value | p            | Est                                        | Std Error | Std Beta | t value | p            |
| MRI<br>(N=55)  | (Intercept) | -13.81                                 | 5.99      |          | -2.31   | 0.025        | 55.06                                      | 10.59     |          | 5.20    | <0.001       |
|                | MRI comp    | 4.03                                   | 0.65      | 0.70     | 6.19    | <0.001       | 7.07                                       | 1.15      | 0.64     | 6.14    | <0.001       |
|                | Age         | 0.18                                   | 0.07      | 0.27     | 2.45    | 0.018        | 0.25                                       | 0.13      | 0.20     | 1.97    | 0.055        |
|                | Sex         | 0.82                                   | 1.14      | 0.08     | 0.72    | 0.472        | 2.05                                       | 2.01      | 0.10     | 1.02    | 0.314        |
|                | Education   | -0.13                                  | 0.20      | -0.08    | -0.67   | 0.505        | 0.92                                       | 0.35      | 0.27     | 2.59    | 0.012        |
| AV 1<br>(N=40) | (Intercept) | -7.57                                  | 8.18      |          | -0.93   | 0.361        | 67.95                                      | 11.94     |          | 5.69    | <0.001       |
|                | AV comp 1   | -3.67                                  | 0.81      | -0.64    | -4.56   | <0.001       | -7.19                                      | 1.17      | -0.67    | -6.12   | <0.001       |
|                | Age         | -0.04                                  | 0.09      | -0.06    | -0.39   | 0.699        | -0.20                                      | 0.14      | -0.16    | -1.45   | 0.156        |
|                | Sex         | 0.97                                   | 1.54      | 0.09     | 0.63    | 0.533        | 3.77                                       | 2.24      | 0.18     | 1.68    | 0.102        |
|                | Education   | 0.38                                   | 0.26      | 0.21     | 1.49    | 0.144        | 2.00                                       | 0.37      | 0.57     | 5.33    | <0.001       |
| AV 2<br>(N=40) | (Intercept) | -18.95                                 | 9.18      |          | -2.06   | 0.047        | 47.54                                      | 16.38     |          | 2.90    | 0.006        |
|                | AV comp 2   | -2.26                                  | 0.90      | -0.39    | -2.51   | <b>0.017</b> | -1.52                                      | 1.61      | -0.14    | -0.95   | <b>0.351</b> |
|                | Age         | 0.14                                   | 0.10      | 0.21     | 1.34    | 0.190        | 0.12                                       | 0.18      | 0.09     | 0.63    | 0.532        |
|                | Sex         | 1.55                                   | 1.82      | 0.14     | 0.85    | 0.402        | 3.68                                       | 3.25      | 0.17     | 1.13    | 0.265        |
|                | Education   | 0.30                                   | 0.30      | 0.16     | 1.02    | 0.316        | 1.88                                       | 0.53      | 0.54     | 3.53    | 0.001        |
| PK 1<br>(N=41) | (Intercept) | -4.72                                  | 9.55      |          | -0.49   | 0.624        | 71.26                                      | 16.81     |          | 4.24    | <0.001       |
|                | PK comp 1   | -2.65                                  | 0.93      | -0.46    | -2.86   | <b>0.007</b> | -4.37                                      | 1.63      | -0.42    | -2.68   | <b>0.011</b> |
|                | Age         | 0.04                                   | 0.11      | 0.05     | 0.32    | 0.751        | 0.00                                       | 0.20      | 0.00     | -0.01   | 0.995        |
|                | Sex         | 0.37                                   | 1.71      | 0.03     | 0.22    | 0.830        | 0.45                                       | 3.00      | 0.02     | 0.15    | 0.882        |
|                | Education   | -0.16                                  | 0.28      | -0.09    | -0.59   | 0.561        | 0.90                                       | 0.49      | 0.27     | 1.83    | 0.076        |
| PK 2<br>(N=41) | (Intercept) | -17.55                                 | 8.85      |          | -1.98   | 0.055        | 51.04                                      | 16.37     |          | 3.12    | 0.004        |
|                | PK comp 2   | -2.50                                  | 1.00      | -0.41    | -2.50   | <b>0.017</b> | -2.17                                      | 1.85      | -0.20    | -1.17   | <b>0.248</b> |
|                | Age         | 0.13                                   | 0.11      | 0.18     | 1.21    | 0.232        | 0.18                                       | 0.20      | 0.14     | 0.92    | 0.362        |
|                | Sex         | 0.92                                   | 1.73      | 0.08     | 0.53    | 0.598        | 1.49                                       | 3.19      | 0.07     | 0.47    | 0.643        |
|                | Education   | 0.27                                   | 0.30      | 0.15     | 0.89    | 0.378        | 1.39                                       | 0.56      | 0.41     | 2.46    | 0.019        |

Abbreviations AV: [<sup>18</sup>F]AV-1451; PK: [<sup>11</sup>C]PK11195; Std: standard; p=uncorrected p-values

**Supplementary Table 6.** Results for the univariable regression models on cognitive slope in patients.

| Model                 |                       | Estimate | Std Error | Std Beta | t value | p    | Adj R <sup>2</sup><br>(std err) | F     | p     |
|-----------------------|-----------------------|----------|-----------|----------|---------|------|---------------------------------|-------|-------|
| <b>MRI</b><br>(N=26)  | <b>(Intercept)</b>    | -5.02    | 1.25      |          | -4.00   | .001 | 0.167<br>(5.18)                 | 6.02  | 0.022 |
|                       | <b>MRI component</b>  | 3.08     | 1.26      | 0.45     | 2.45    | .022 |                                 |       |       |
| <b>AV 1</b><br>(N=26) | <b>(Intercept)</b>    | -6.23    | 0.97      |          | -6.43   | .000 | 0.271<br>(4.84)                 | 10.29 | 0.004 |
|                       | <b>AV component 1</b> | -2.63    | 0.82      | -0.55    | -3.21   | .004 |                                 |       |       |
| <b>AV 2</b><br>(N=26) | <b>(Intercept)</b>    | -6.56    | 1.13      |          | -5.78   | .000 | 0.007<br>(5.65)                 | 1.18  | 0.289 |
|                       | <b>AV component 2</b> | -1.08    | 0.99      | -0.22    | -1.09   | .289 |                                 |       |       |
| <b>PK 1</b><br>(N=26) | <b>(Intercept)</b>    | -6.36    | 1.06      |          | -6.01   | .000 | 0.131<br>(5.29)                 | 4.78  | 0.039 |
|                       | <b>PK component 1</b> | -2.02    | 0.92      | -0.41    | -2.19   | .039 |                                 |       |       |
| <b>PK 2</b><br>(N=26) | <b>(Intercept)</b>    | -6.54    | 1.06      |          | -6.20   | .000 | 0.116<br>(5.34)                 | 4.27  | 0.05  |
|                       | <b>PK component 2</b> | -2.11    | 1.02      | -0.39    | -2.07   | .050 |                                 |       |       |

Abbreviations AV: [<sup>18</sup>F]AV-1451; PK: [<sup>11</sup>C]PK11195; Std: standard; Adj: adjusted, p=uncorrected p-values

**Supplementary Table 7.** Results for the multiple regression model in patients with Alzheimer’s dementia and Mild Cognitive Impairment. For each of the three multiple regression models applied and described in the methods’ section, the estimated coefficients are reported for the full/initial model and the final model, indicated by the stepwise backward elimination.

| Dependent variable | Model                      | Estimate       | Std Error | Std Beta | t value | P     | Adj R <sup>2</sup> (std err) | F            | p    |       |
|--------------------|----------------------------|----------------|-----------|----------|---------|-------|------------------------------|--------------|------|-------|
| slope              | Full                       | (Intercept)    | -7.09     | 11.14    |         | -0.64 | 0.533                        | 0.389 (4.43) | 2.99 | 0.027 |
|                    |                            | MRI component  | 0.85      | 1.39     | 0.12    | 0.62  | 0.547                        |              |      |       |
|                    |                            | AV component 1 | -2.30     | 1.07     | -0.48   | -2.14 | 0.047*                       |              |      |       |
|                    |                            | AV component 2 | -1.18     | 0.94     | -0.24   | -1.26 | 0.224                        |              |      |       |
|                    |                            | PK component 1 | -1.59     | 1.10     | -0.32   | -1.45 | 0.164                        |              |      |       |
|                    |                            | PK component 2 | -1.28     | 1.10     | -0.24   | -1.17 | 0.260                        |              |      |       |
|                    |                            | Age            | 0.00      | 0.15     | 0.01    | 0.03  | 0.980                        |              |      |       |
|                    |                            | Education      | 0.11      | 0.36     | 0.06    | 0.30  | 0.765                        |              |      |       |
|                    |                            | Sex            | 0.85      | 2.02     | 0.08    | 0.42  | 0.678                        |              |      |       |
|                    | Full (only brain measures) | (Intercept)    | -5.03     | 1.01     |         | -4.99 | 0.000*                       | 0.474 (4.12) | 5.50 | 0.002 |
|                    |                            | MRI component  | 0.84      | 1.22     | 0.12    | 0.67  | 0.501                        |              |      |       |
|                    |                            | AV component 1 | -2.20     | 0.74     | -0.46   | -2.96 | 0.008*                       |              |      |       |
|                    |                            | AV component 2 | -1.07     | 0.82     | -0.21   | -1.31 | 0.205                        |              |      |       |
|                    |                            | PK component 1 | -1.68     | 0.86     | -0.39   | -1.95 | 0.066                        |              |      |       |
|                    |                            | PK component 2 | -1.25     | 0.87     | -0.23   | -1.43 | 0.168                        |              |      |       |
|                    | Final                      | (Intercept)    | -5.41     | 0.87     |         | -6.19 | 0.000*                       | 0.458 (4.18) | 8.05 | 0.001 |
|                    |                            | AV component 1 | -2.57     | 0.71     | -0.54   | -3.60 | 0.002*                       |              |      |       |
|                    |                            | AV component 2 | -1.64     | 0.74     | -0.33   | -2.21 | 0.038*                       |              |      |       |
|                    |                            | PK component 1 | -1.92     | 0.74     | -0.39   | -2.59 | 0.017*                       |              |      |       |

Abbreviations AV: [<sup>18</sup>F]AV-1451; PK: [<sup>11</sup>C]PK11195; Std: standard; Adj: adjusted  
Significance code: \*= p<0.05



**Supplementary Table 8.** Model comparison on the Bayesian multiple regression with cognitive slope as the dependent variable and brain imaging components and demographic variables as predictors. The models are ordered by the higher Bayes Factor ( $BF_{10}$ ) to the lowest. The table shows the ten most likely models, the null model, and the least likely model at the bottom. The Bayes Factor has been calculated for each model to the null model with respect to the null model. By convention, a  $BF > 3$  indicates positive evidence in favour of the alternate model,  $BF > 10$  strong evidence and  $BF > 100$  very strong evidence (Kass and Raftery, 1995). The top three ranked models are therefore significantly ‘better’ prognostic models than any other model, including any model with MRI.

| Models                                               | P(M)  | P(M data) | $BF_M$ | $BF_{10}$ | $R^2$ |
|------------------------------------------------------|-------|-----------|--------|-----------|-------|
| AV COMP1 + AV COMP2 + PK COMP1                       | 0.004 | 0.033     | 8.744  | 46.560    | 0.523 |
| AV COMP1 + PK COMP1 + PK COMP2                       | 0.004 | 0.032     | 8.333  | 44.443    | 0.521 |
| AV COMP1 + AV COMP2 + PK COMP1 + PK COMP2            | 0.004 | 0.030     | 7.804  | 41.705    | 0.569 |
| MRI COMP + AV COMP1 + PK COMP1 + PK COMP2            | 0.004 | 0.018     | 4.680  | 25.31     | 0.543 |
| MRI COMP + AV COMP1 + AV COMP2 + PK COMP1            | 0.004 | 0.016     | 4.112  | 22.289    | 0.536 |
| MRI COMP + AV COMP1 + PK COMP2                       | 0.004 | 0.016     | 4.031  | 21.856    | 0.481 |
| AV COMP1 + PK COMP1                                  | 0.004 | 0.015     | 3.835  | 20.806    | 0.417 |
| MRI COMP + AV COMP1                                  | 0.004 | 0.015     | 3.817  | 20.714    | 0.417 |
| AV COMP1 + AV COMP2 + PK COMP1 + Sex                 | 0.004 | 0.015     | 3.808  | 20.663    | 0.532 |
| MRI COMP + AV COMP1 + AV COMP2 + PK COMP1 + PK COMP2 | 0.004 | 0.014     | 3.722  | 20.205    | 0.579 |
| ...                                                  |       |           |        |           |       |
| Null model                                           | 0.004 | 7.120e -4 | 0.182  | 1         | 0     |
| ...                                                  |       |           |        |           |       |
| AV COMP2 + Education + Sex                           | 0.004 | 1.398e -4 | 0.036  | 0.196     | 0.082 |

Abbreviations AV: [ $^{18}F$ ]AV-1451; PK: [ $^{11}C$ ]PK11195; COMP: component; BF: Bayes factor

## Supplementary material and methods

### Statistical analyses

***Latent Growth Curve Model with quadratic term for cognitive decline.*** Hypothesising that the cognitive decline over 3 years follows a linear trajectory in aging and Alzheimer's disease, we compared the linear model of change with a quadratic model. To determine whether a quadratic function is appropriate, the models with and without the quadratic effect were compared with a likelihood ratio test.

***Two-step frequentist prediction procedure on patients only.*** We applied a two-step prediction procedure to patient data: 1) extracting individual slope values from the initial LGCM for cognitive data across the 26 patients, and 2) including these values as dependent variable in linear regression models with brain imaging components as predictors. We present both frequentist and Bayesian analyses to ensure inferential robustness and allowing us to quantify evidence in favour of the null hypothesis.

### Supplementary results

***Latent Growth Curve Model with the quadratic term.*** The LGCM with the quadratic term on longitudinal ACE-R scores fitted the data adequately ( $\chi^2(4)=2.78$ ,  $p=0.595$ ; RMSEA=0.00 [0.00 – 0.21], CFI=1.00, SRMR=0.014). However, comparing the model fit between the linear and the quadratic LGCM on ACE-R scores, the ANOVA test (anova() R function) did not find significant differences (Chisq Diff= 3.04,  $p=0.219$ ) between the linear model (AIC=1249.2) and the quadratic one (AIC=1250.3). This means that adding the quadratic term does not improve the model of cognitive decline.

***Two-step frequentist prediction procedure for intercept.*** Across all subjects, the initial cognitive performance (intercept in LGCM on ACER scores) was significantly associated with: 1) the MRI component weighting (Std Beta=0.67,  $p<0.001$ ); 2) the posterior [ $^{18}\text{F}$ ]AV-1451 (Std Beta=-0.55,  $p<0.001$ ); 3) and anterior [ $^{11}\text{C}$ ]PK11195 (Std Beta=-0.46,  $p=0.003$ ), surviving Bonferroni's correction. Non-significant correlations of slope were found with the anterior [ $^{18}\text{F}$ ]AV-1451 (Std Beta=-0.15,  $p=0.35$ ), and the posterior [ $^{11}\text{C}$ ]PK11195 (Std Beta=-0.06  $p=0.72$ ). These results remained unchanged if including age, sex and education as covariates in the models (Supplementary Table 5). In patients, the final model of multiple regression on cognitive intercept (adjusted  $R^2 = 0.519$ , Std Error= 5.81;  $p<0.001$ ) included the education variable (Est=1.02, Std Error=0.38,  $p=0.014$ ), the MRI component (Est=3.61, Std Error=1.46,  $p=0.021$ ) and the posterior [ $^{18}\text{F}$ ]AV1451 (Est=-3.99, Std Error=1.05,  $p=0.001$ ) as predictors.

***Two-step frequentist prediction procedure on patients only.*** The cognitive LGCM on patients converged using robust maximum likelihood estimation and yielded adequate fit ( $\chi^2(8)=9.40$ ,  $p=0.310$ ; RMSEA=0.08 [0.00 – 0.26], CFI=0.99, SRMR=0.07). The mean of the intercept was 77.52 (SE=1.73,  $z$ -value=44.93, Std Est =9.27,  $p<0.001$ ) and average cognition declined over time (slope, estimate (est)=-6.87, SE=1.35,  $z$ -value=-5.09, Std Est=-1.09,  $p<0.001$ ).

Across all patients, the rate of cognitive decline was associated with: 1) the MRI component (Std Beta=0.45,  $p=0.034$ ); 2) the posterior [ $^{18}\text{F}$ ]AV-1451 (Std Beta=-0.53,  $p=0.005$ ); 3) anterior [ $^{11}\text{C}$ ]PK11195 (Std Beta=-0.40,  $p=0.041$ ); and the posterior [ $^{11}\text{C}$ ]PK11195 (Std Beta=-0.40,  $p=0.05$ ). Running the regression model with all imaging components and demographic variables, the final model on cognitive slope selected by the backward selection (adjusted  $R^2 = 0.437$ , Std Error= 7.46;  $p=0.001$ ) included both [ $^{18}\text{F}$ ]AV-1451 components (#1: Est=-2.64, Std Error=0.77,  $p=0.002$ ; #2: Est=-1.77, Std Error=0.81,  $p=0.039$ ), and the anterior [ $^{11}\text{C}$ ]PK11195 (#1: Est=-2.03,

Std Error=0.80,  $p=0.019$ ) as predictors. We estimated the comparable models using Bayesian regression. The results were in accord with the backward selection method, with the best model including both [ $^{18}\text{F}$ ]AV-1451 components and the anterior [ $^{11}\text{C}$ ]PK11195 component ( $\text{BF}_{10} = 32.85$ ;  $R^2 = 0.504$ ).
